# Supplementary material for: High strength composite fibres from polyester filled with nanotubes and graphene
Source: Royal Society of Chemistry journal article supplement (doi:10.1039/c2jm31946b), 2012-01-01
Supplement: c2jm31946b.pdf [file c2jm31946b.pdf]

Supporting Information for

High strength composite fibres from polyester filled with nanotubes and graphene

Umar Khan, Karen Young, Arlene O'Neill and Jonathan N Coleman\*

*Centre for Research on Adaptive Nanostructures and Nanodevices and School of Physics,  
Trinity College Dublin, Dublin 2, Ireland*

[\\*colemaj@tcd.ie](mailto:*colemaj@tcd.ie)

### Volume fraction dependence for SWNT-PET composites

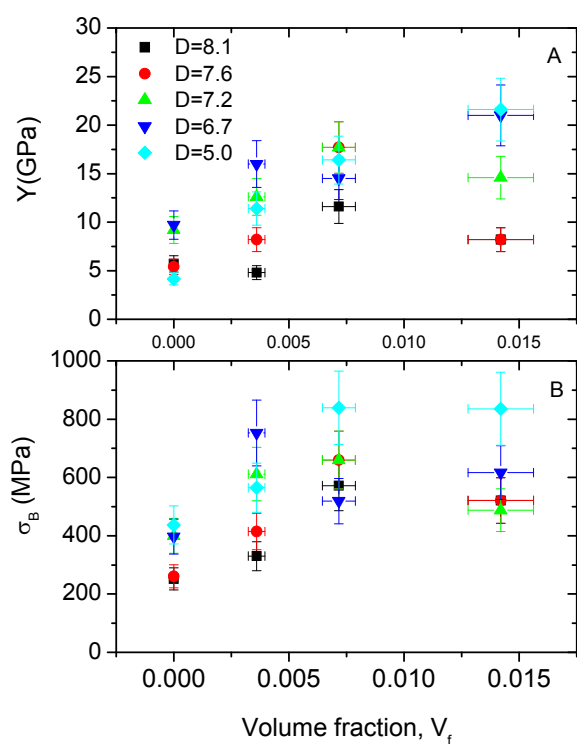

Figure S1: Young's modulus and ultimate tensile strength as a function of nanotube volume fraction for fibres with a range of mean diameters from 5.0 to 8.1  $\mu\text{m}$ .

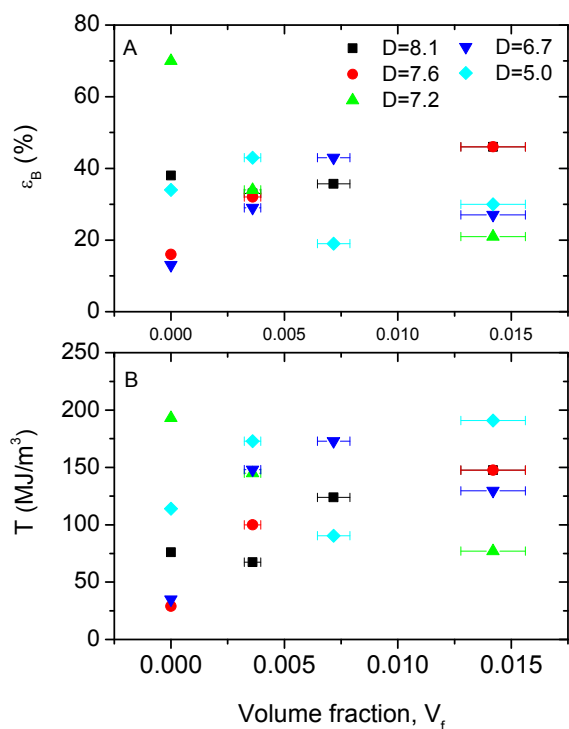

Figure S2: Strain at break and tensile toughness as a function of nanotube volume fraction for fibres with a range of mean diameters from 5.0 to 8.1  $\mu\text{m}$ .

### TEM analysis of Graphene Dispersions

It is possible to investigate the graphene dispersion using transmission electron microscopy (TEM) by dropping a small quantity of the dispersion onto holey carbon grids. Representative TEM images are shown in Figure S3.

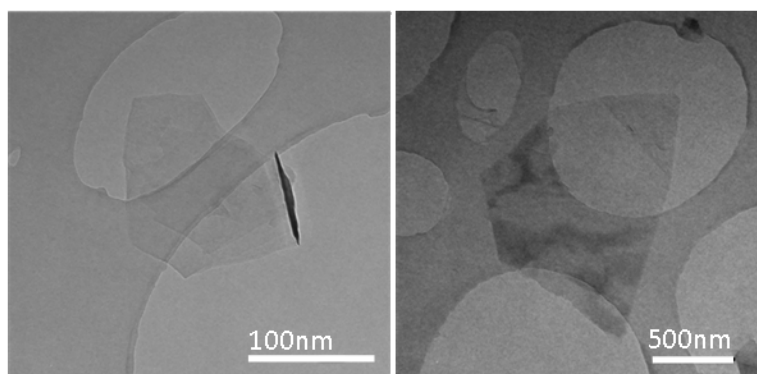

Figure S3: TEM images of exfoliated graphene multilayers deposited from the dispersion used to prepare the PET-graphene composite melts.

TEM flake size statistics can also be found for the graphene dispersion. The flake thickness,  $N$ , was measured using the edge counting method, described in detail in *Small* 6, 864 (see figure S4).

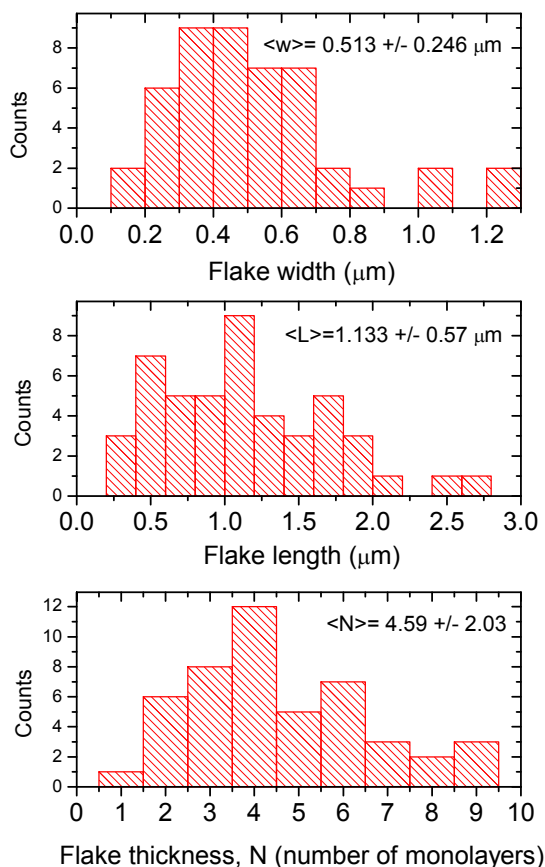

Figure S4: TEM statistics of graphene flakes centrifuged at 1000rpm where  $w$  is the width of the flake,  $L$  is the length and  $n$  is the number of graphene layers.

### Raman analysis of Graphene Dispersions

Raman spectra for the graphene dispersion used for this work are shown in Figure S5. A reference graphite powder is shown also as a comparison. Here the D band ( $\sim 1300\text{cm}^{-1}$ ) is indicative of the presence of defects. However, we note that for small flakes such as those observed here, significant D bands can come simply from the presence of flake edges (*Small* 6, 864).

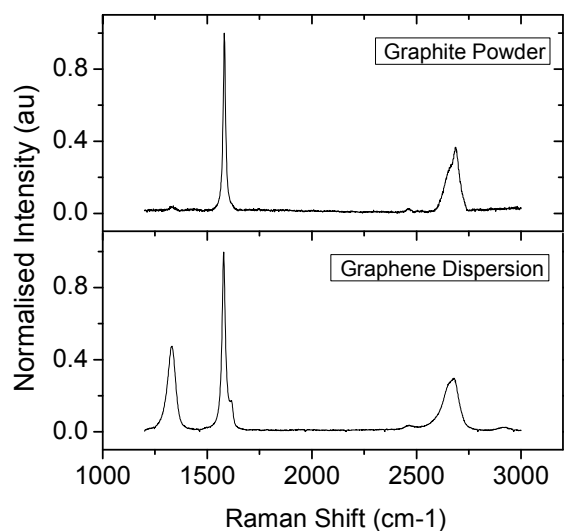

Figure S5: Raman spectra of A) graphite powder and B) the dispersed graphene (after filtration to form a film).

### Volume fraction dependence for Graphene-PET composites

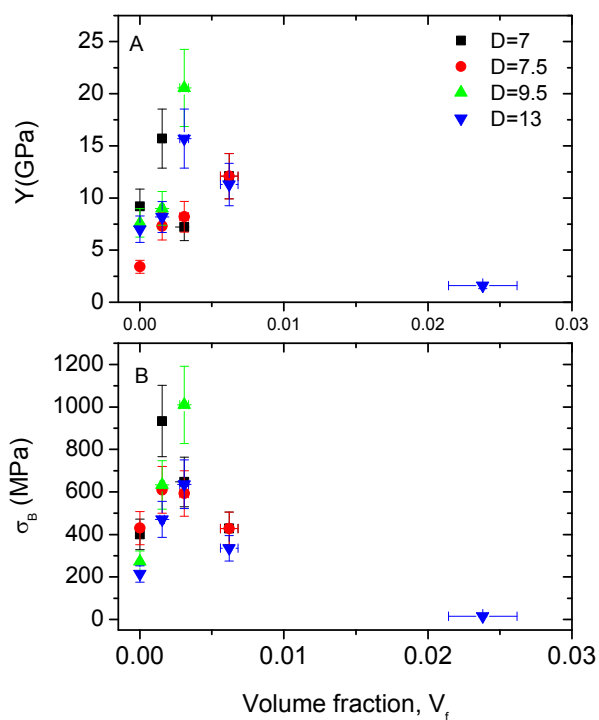

Figure S6: Young's modulus and strength as a function of graphene volume fraction for fibres with a range of mean diameters from 7 to 13  $\mu\text{m}$ .

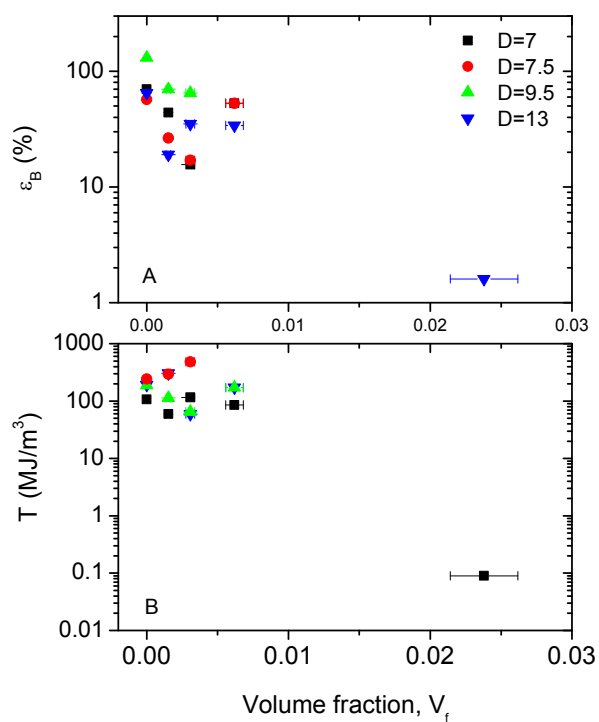

Figure S7: Strain at break and tensile toughness as a function of graphene volume fraction for fibres with a range of mean diameters from 7 to 13  $\mu\text{m}$ .
